# Supplementary material for: Gait disturbances and muscle dysfunction in fibroblast growth factor 2 knockout mice
Source: PubMed Central journal article supplement (PMC8154953; doi:10.1038/s41598-021-90565-0), 2021-05-26
Supplement: 41598_2021_90565_MOESM1_ESM.pdf [file 41598_2021_90565_MOESM1_ESM.pdf]

**Gait Disturbances and Muscle Dysfunction in Fibroblast Growth Factor 2 Knockout Mice**  
 Homer-Bouthiette, C., Xiao, L., & Hurley, M. M.

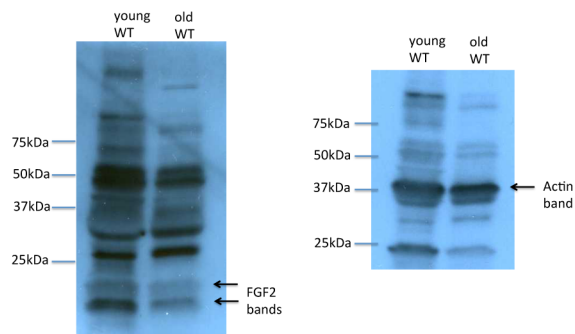

Supplemental Figure 1. Entire uncut Western blots in Figure 3b.

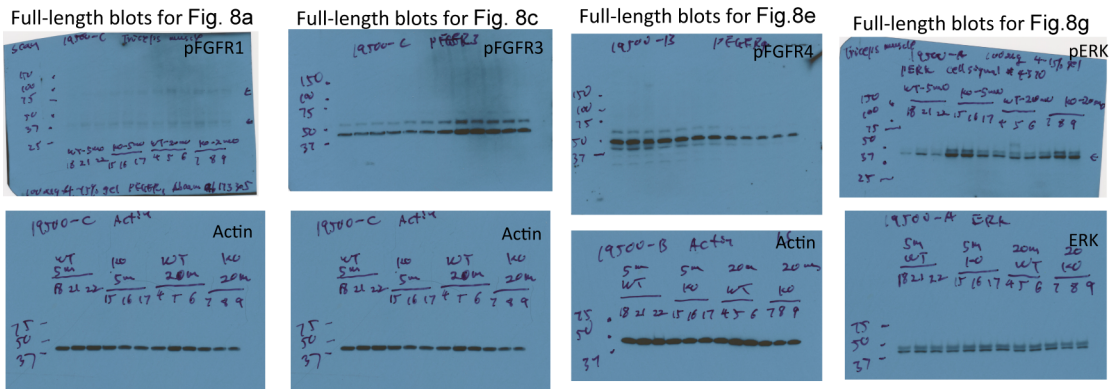

Supplemental Figure 2. Entire uncut Western blots in Figure 8a,c,e,g.
